# Supplementary material
Source: PubMed Central journal article supplement (PMC3089881)
Supplement: 97320630006095S1.pdf [file 97320630006095S1.pdf]

## Supplementary material:

**Table 1:** List of programs available for differential gene expression analysis.

| S.No | Software | Algorithm/Method                        | URL/Reference                                                                                          |
|------|----------|-----------------------------------------|--------------------------------------------------------------------------------------------------------|
| 1.   | SAM      | Modified t-test known as SAM            | <a href="http://www-stat.stanford.edu/~tibs/SAM/">http://www-stat.stanford.edu/~tibs/SAM/</a> [35]     |
| 2.   | MeV      | non-parametric t-test/ ANOVA            | <a href="http://www.tm4.org/mev/">http://www.tm4.org/mev/</a> . [36]                                   |
| 3.   | iArray   | Student's t-test and Mann- Whitney test | <a href="http://zhoulab.usc.edu/iArrayAnalyzer.htm">http://zhoulab.usc.edu/iArrayAnalyzer.htm</a> [37] |
| 4.   | EDGE     | Optimal Discovery Procedure             | <a href="http://www.genomine.org/edge/">http://www.genomine.org/edge/</a> [38]                         |
| 5.   | Cyber-T  | Simple t-test or regularized t-tests    | <a href="http://cybert.microarray.ics.uci.edu/">http://cybert.microarray.ics.uci.edu/</a> [12]         |

**Table 2:** List of programs available for cluster analysis.

| S.No | Software             | Algorithm/Method                                                                                   | URL/Reference                                                                                                                  |
|------|----------------------|----------------------------------------------------------------------------------------------------|--------------------------------------------------------------------------------------------------------------------------------|
| 1.   | Cluster and Treeview | Hierarchical clustering, K-means clustering self organizing maps etc.                              | <a href="http://rana.lbl.gov/EisenSoftware.htm">http://rana.lbl.gov/EisenSoftware.htm</a> [15]                                 |
| 2.   | dChip                | Hierarchical clustering, K-means clustering self organizing maps etc.                              | <a href="http://biosun1.harvard.edu/complab/dchip/">http://biosun1.harvard.edu/complab/dchip/</a> [39]                         |
| 3.   | MeV                  | Hierarchical clustering, K-means clustering, Tree EASE, self organizing maps, & QT-clustering etc. | <a href="http://www.tm4.org/mev/">http://www.tm4.org/mev/</a> . [36]                                                           |
| 4.   | MAGIC Tools          | Hierarchical clustering, K-means clustering, and QT-clustering                                     | <a href="http://www.bio.davidson.edu/projects/magic/magic.html">http://www.bio.davidson.edu/projects/magic/magic.html</a> [40] |
| 5.   | CAGED                | Bayesian clustering program on a-temporal expression data.                                         | <a href="http://www.genomethods.org/caged/">http://www.genomethods.org/caged/</a> [41]                                         |

**Table 3:** List of programs available for classification.

| S.No | Software            | Algorithm/Method                                                                                   | URL/Reference                                                                                                                              |
|------|---------------------|----------------------------------------------------------------------------------------------------|--------------------------------------------------------------------------------------------------------------------------------------------|
| 1.   | weka                | Artificial Neural Networks, Decision trees, k Nearest Neighbors, Support Vector Machines, and many | <a href="http://www.cs.waikato.ac.nz/ml/weka/">http://www.cs.waikato.ac.nz/ml/weka/</a> [42]                                               |
| 2.   | SAS                 | Artificial Neural Networks, Decision trees, k Nearest Neighbors, Support Vector Machines, and many | <a href="http://www.sas.com/technologies/analytics/datamining/miner/">http://www.sas.com/technologies/analytics/datamining/miner/</a> [43] |
| 3.   | IBM/SPSS Clementine | Artificial Neural Networks, Decision trees, k Nearest Neighbors, Support Vector Machines, and many | <a href="http://www.spss.com/software/modeling/modeler-pro/">http://www.spss.com/software/modeling/modeler-pro/</a> [44]                   |
| 4.   | SVMLight            | Support Vector Machines                                                                            | <a href="http://svmlight.joachims.org/">http://svmlight.joachims.org/</a> [45]                                                             |
| 5.   | LIBSVM              | Support Vector Machines                                                                            | <a href="http://www.csie.ntu.edu.tw/~cjlin/libsvmtools/">http://www.csie.ntu.edu.tw/~cjlin/libsvmtools/</a> [46]                           |

**Table 4:** List of tools for transcription factor binding site.

| S.No | Software / Tool     | Algorithm/Method                          | URL/Reference                                                                                                                    |
|------|---------------------|-------------------------------------------|----------------------------------------------------------------------------------------------------------------------------------|
| 1    | oPOSSUM             | Position weight matrix, Fisher exact test | <a href="http://www.cisreg.ca/oPOSSUM/">http://www.cisreg.ca/oPOSSUM/</a> [47]                                                   |
| 2    | MATCH               | Position weight matrix                    | <a href="http://www.gene-regulation.com/pub/programs.html#match">http://www.gene-regulation.com/pub/programs.html#match</a> [48] |
| 3    | ConTra              | Position weight matrix, HMM               | <a href="http://bioit.dnbr.ugent.be/ConTra/index.php">http://bioit.dnbr.ugent.be/ConTra/index.php</a> [49]                       |
| 4    | Whole Genome rVISTA | Position weight matrix                    | <a href="http://genome.lbl.gov/vista/index.shtml">http://genome.lbl.gov/vista/index.shtml</a> [50]                               |
| 5    | TFSCAN              | Position weight matrix, word-matching     | <a href="http://mobyli.pasteur.fr/cgi-bin/portal.py?form=tfscan">http://mobyli.pasteur.fr/cgi-bin/portal.py?form=tfscan</a> [51] |
| 6    | TFSEARCH            | Position weight matrix                    | <a href="http://www.cbrc.jp/research/db/TFSEARCH.html">http://www.cbrc.jp/research/db/TFSEARCH.html</a> [52]                     |
| 7    | TransFind           | Position weight matrix, Fisher exact test | <a href="http://transfind.sys-bio.net/">http://transfind.sys-bio.net/</a> [53]                                                   |

**Table 5:** List of softwares for PPI and Pathway analysis.

| S.No | Software                   | Application                                                         | URL/Reference                                                                                                                        |
|------|----------------------------|---------------------------------------------------------------------|--------------------------------------------------------------------------------------------------------------------------------------|
| 1    | Pathway Studio             | Pathway network analysis, data mining, and visualization etc.       | <a href="http://www.ariadnegenomics.com/products/pathway-studio/">http://www.ariadnegenomics.com/products/pathway-studio/</a> [54]   |
| 2    | Ingenuity Pathway Analysis | Cancer pathway network analysis.                                    | <a href="http://www.ingenuity.com/">http://www.ingenuity.com/</a> [55]                                                               |
| 3    | Cytoscape                  | PPI network analysis, gene annotation and pathway integration, etc. | <a href="http://www.cytoscape.org/">http://www.cytoscape.org/</a> [56]                                                               |
| 4    | Pajek                      | Analysis and visualization of large networks, etc                   | <a href="http://vlado.fmf.uni-lj.si/pub/networks/pajek/">http://vlado.fmf.uni-lj.si/pub/networks/pajek/</a> [57]                     |
| 5    | GenMAPP2                   | Gene expression, Pathway analysis, and GO analysis                  | <a href="http://www.genmapp.org">www.genmapp.org</a> [ 58]                                                                           |
| 6    | ArrayXPath                 | Mapping, visualizing expression data, and pathway analysis          | <a href="http://www.snubi.org/software/ArrayXPath/">http://www.snubi.org/software/ArrayXPath/</a> [59]                               |
| 7    | PathExpress                | Pathway analysis and visualization                                  | <a href="http://bioinfoserver.rsbs.anu.edu.au/utlils/PathExpress/">http://bioinfoserver.rsbs.anu.edu.au/utlils/PathExpress/</a> [60] |
| 8    | GO-cluster                 | GO based pathway analysis                                           | <a href="http://www.mpibpc.mpg.de/go-cluster/">http://www.mpibpc.mpg.de/go-cluster/</a> [61]                                         |
| 9    | GO-view                    | GO based pathway analysis                                           | <a href="http://db.math.macalester.edu/goproject">http://db.math.macalester.edu/goproject</a> [62]                                   |
| 10   | Onto-Express               | GO based pathway analysis                                           | <a href="http://vortex.cs.wayne.edu/Projects.html">http://vortex.cs.wayne.edu/Projects.html</a> [63]                                 |
| 11   | Pathway Miner              | cellular and regulatory pathway analysis                            | <a href="http://www.biorag.org/pathway.html">http://www.biorag.org/pathway.html</a> [64]                                             |
| 12   | Gominer                    | GO based pathway analysis                                           | <a href="http://discover.nci.nih.gov/gominer/">http://discover.nci.nih.gov/gominer/</a> [65]                                         |

|    |             |                                       |                                                                            |
|----|-------------|---------------------------------------|----------------------------------------------------------------------------|
| 13 | visANT 3.86 | Pathway and network analysis          | <a href="http://visant.bu.edu/">http://visant.bu.edu/</a> [66]             |
| 14 | KOBAS       | KEGG Orthology-based pathway analysis | <a href="http://kobas.cbi.pku.edu.cn">http://kobas.cbi.pku.edu.cn</a> [67] |

**Table 6:** List of available programs for gene set enrichment analysis.

| S.No | Software/Tools | Algorithm/ Method                                           | URL/Reference                                                                                                                  |
|------|----------------|-------------------------------------------------------------|--------------------------------------------------------------------------------------------------------------------------------|
| 1    | GSEA           | Null hypothesis                                             | <a href="http://www.broadinstitute.org/gsea/">http://www.broadinstitute.org/gsea/</a> [34]                                     |
| 2    | MeV            | Null hypothesis, linear model                               | <a href="http://www.tm4.org/mev/">http://www.tm4.org/mev/</a> . [36]                                                           |
| 3    | GeneTrail      | Dynamic-programming                                         | <a href="http://genetrail.bioinf.uni-sb.de/">http://genetrail.bioinf.uni-sb.de/</a> [68]                                       |
| 4    | ConceptGen     | Parametric and non-parametric tests                         | <a href="http://conceptgen.ncibi.org/core/conceptGen/index.jsp">http://conceptgen.ncibi.org/core/conceptGen/index.jsp</a> [69] |
| 5    | GAzer          | Z-test, Parametric and non-parametric tests                 | <a href="http://expressome.kobic.re.kr/GAzer/index.faces">http://expressome.kobic.re.kr/GAzer/index.faces</a> [70]             |
| 6    | PhenoFam       | Mann-Whitney U test, $\rho$ - Herrnstein's $\rho$ statistic | <a href="http://appserver.biotec.tu-dresden.de/phenofam/">http://appserver.biotec.tu-dresden.de/phenofam/</a> [71]             |
